# Supplementary material for: Anopheline diversity in urban and peri-urban malaria foci: comparison between alternative traps and seasonal effects in a city in the Western Brazilian Amazon
Source: PubMed Central journal article supplement (PMC9450372; doi:10.1186/s12936-022-04274-8), 2022-09-06
Supplement: 12936_2022_4274_MOESM1_ESM.pdf [file 12936_2022_4274_MOESM1_ESM.pdf]

## Additional File 1

### Site Selection Criteria

The starting point for site selection criteria was the number of malaria cases in the localities from the city of Porto Velho, between 2015-2017. Localities with no malaria cases were excluded from site selection. Epidemiological data were extracted from the Brazilian National Malaria Surveillance System (SIVEP-Malaria), clustered as “Porto Velho”, and stratified by probable place of infection. This stratification was performed for each year separately, and the locations were ranked according to malaria cases. The 30 locations with the highest number of cases were compared between the years 2015, 2016 to 2017 (Table S1).

In order to restrict sampling sites to areas administratively defined as “urban areas”, we check each site location on the administrative map of the city of Porto Velho [SEMPOG 2022]. Urban sites were located in the urban core and expansion area and peri-urban sites were peripheral, about 1-4 km from urban administrative boundaries (Figure S1). Urban expansion area was administratively defined as a residential land use of low human density. Urban e peri-urban locations that remained in the rank in these three years were visited (1 night, from 6 pm to 10 pm) in months with highest *Anopheles* density in urban areas (from April to August 2017), and the presence/absence of anophelines was recorded (Table S2). Vegetation cover and watercourses close to residential areas were also taken into account when selecting the four sites.

**Table S1.** Number of malaria cases in the urban and peri-urban localities from the city of Porto Velho, between 2015-2017.

| Malaria Epidemiological Surveillance Information System - SIVEP MALARIA |               |                                       |                     |              |                    |              |
|-------------------------------------------------------------------------|---------------|---------------------------------------|---------------------|--------------|--------------------|--------------|
| Malaria Epidemiological Summary                                         |               |                                       |                     |              |                    |              |
| Source Data: Probable place of infection                                |               |                                       | State: RO           |              | County:PORTO VELHO |              |
| Period: 01/01/2015 a 31/12/2017                                         |               |                                       |                     |              |                    |              |
| Year                                                                    | Cod. Locality | Locality                              | Class               | Population   | Positives          | IPA          |
| 2015                                                                    | 739           | São João                              | Ranch               | 126          | 141                | 1119         |
| 2015                                                                    | 155           | Areia Branca - Area Rural (Balneário) | Balneary            | 270          | 128                | 474.1        |
| <b>2015</b>                                                             | <b>396</b>    | <b>Belmont</b>                        | <b>Ranch</b>        | <b>585</b>   | <b>98</b>          | <b>167.5</b> |
| 2015                                                                    | 121           | Bacia Leiteira                        | Ranch               | 180          | 91                 | 505.6        |
| 2015                                                                    | 898           | Vila do DNIT (8ª Região)              | Village             | 4684         | 91                 | 19.4         |
| 2015                                                                    | 53            | Areia Branca                          | Neighborhood        | 1647         | 84                 | 51           |
| 2015                                                                    | 140           | Km 14                                 | Ranch               | 247          | 84                 | 340.1        |
| 2015                                                                    | 737           | Km13/Santa Helena                     | Farm                | 378          | 79                 | 209          |
| <b>2015</b>                                                             | <b>148</b>    | <b>Colônia Viçosa</b>                 | <b>Colony</b>       | <b>391</b>   | <b>60</b>          | <b>153.5</b> |
| 2015                                                                    | 141           | Uberaba                               | Ranch               | 167          | 52                 | 311.4        |
| 2015                                                                    | 44            | Triângulo                             | Neighborhood        | 3819         | 50                 | 13.1         |
| 2015                                                                    | 407           | Maravilha (Rio Madeira)               | Ranch               | 185          | 48                 | 259.5        |
| 2015                                                                    | 630           | Novo Engenho Velho                    | Thorp               | 144          | 47                 | 326.4        |
| 2015                                                                    | 337           | Vista Alegre do Abunã                 | Village             | 3973         | 46                 | 11.6         |
| 2015                                                                    | 152           | Colônia Japonesa                      | Colony              | 98           | 45                 | 459.2        |
| 2015                                                                    | 320           | Marmelo - Br 364 Pvh/Acre             | Ranch               | 58           | 44                 | 758.6        |
| 2015                                                                    | 428           | Gleba Jamary                          | Road                | 280          | 43                 | 153.6        |
| <b>2015</b>                                                             | <b>6</b>      | <b>Nova Esperança</b>                 | <b>Neighborhood</b> | <b>11730</b> | <b>42</b>          | <b>3.6</b>   |

|             |            |                                        |                     |              |            |              |
|-------------|------------|----------------------------------------|---------------------|--------------|------------|--------------|
| 2015        | 151        | Jerusalem da Amazonia                  | Ranch               | 120          | 41         | 341.7        |
| 2015        | 93         | Estrada da Penitencia (P.A. Aliança)   | Settlement          | 241          | 39         | 161.8        |
| 2015        | 35         | Nacional                               | Neighborhood        | 8043         | 38         | 4.7          |
| 2015        | 99         | Terra Santa                            | Farm                | 328          | 35         | 106.7        |
| 2015        | 156        | Colônia Mato Grosso (Unir)             | Colony              | 120          | 34         | 283.3        |
| 2015        | 399        | Cujubim Grande                         | Ranch               | 228          | 34         | 149.1        |
| 2015        | 284        | São Joao - Rio Madeira                 | Ranch               | 25           | 33         | 1320         |
| 2015        | 743        | São Sebastião - Rio Madeira            | Ranch               | 174          | 28         | 160.9        |
| 2015        | 709        | Castanheira                            | Neighborhood        | 13014        | 27         | 2.1          |
| 2015        | 715        | Bate Estaca                            | Neighborhood        | 1392         | 26         | 18.7         |
| <b>2015</b> | <b>887</b> | <b>Bairro Novo (Br 364)</b>            | <b>Neighborhood</b> | <b>1918</b>  | <b>24</b>  | <b>12.5</b>  |
| 2015        | 214        | Linha H-27                             | Road                | 1350         | 24         | 17.8         |
| 2016        | 140        | Km 14                                  | Ranch               | 247          | 154        | 623.5        |
| 2016        | 121        | Bacia Leiteira                         | Ranch               | 180          | 95         | 527.8        |
| 2016        | 737        | Km13/Santa Helena                      | Farm                | 378          | 95         | 251.3        |
| 2016        | 337        | Vista Alegre do Abunã                  | Village             | 3973         | 85         | 21.4         |
| <b>2016</b> | <b>148</b> | <b>Colônia Viçosa</b>                  | <b>Colony</b>       | <b>391</b>   | <b>81</b>  | <b>207.2</b> |
| 2016        | 141        | Uberaba                                | Ranch               | 167          | 70         | 419.2        |
| 2016        | 898        | Vila do DNIT (8ª Região)               | Village             | 4684         | 70         | 14.9         |
| 2016        | 152        | Colônia Japonesa                       | Colony              | 98           | 68         | 693.9        |
| 2016        | 155        | Areia Branca - Area Rural (Balneário)  | Neighborhood        | 270          | 66         | 244.4        |
| 2016        | 151        | Jerusalem da Amazonia                  | Ranch               | 120          | 50         | 416.7        |
| 2016        | 407        | Maravilha (Rio Madeira)                | Ranch               | 185          | 47         | 254.1        |
| 2016        | 320        | Marmelo - Br 364 Pvh/Acre              | Ranch               | 58           | 42         | 724.1        |
| 2016        | 739        | São João                               | Ranch               | 126          | 42         | 333.3        |
| <b>2016</b> | <b>396</b> | <b>Belmont</b>                         | <b>Ranch</b>        | <b>585</b>   | <b>38</b>  | <b>65</b>    |
| 2016        | 22         | Aeroclube                              | Neighborhood        | 2625         | 34         | 13           |
| <b>2016</b> | <b>887</b> | <b>Bairro Novo (Br 364)</b>            | <b>Neighborhood</b> | <b>1918</b>  | <b>33</b>  | <b>17.2</b>  |
| 2016        | 93         | Estrada da Penitencia (P.A. Aliança)   | Settlement          | 241          | 33         | 136.9        |
| 2016        | 35         | Nacional                               | Neighborhood        | 8043         | 32         | 4            |
| <b>2016</b> | <b>6</b>   | <b>Nova Esperança</b>                  | <b>Neighborhood</b> | <b>11730</b> | <b>29</b>  | <b>2.5</b>   |
| 2016        | 71         | Mariana                                | Neighborhood        | 14055        | 28         | 2            |
| 2016        | 99         | Terra Santa                            | Farm                | 328          | 25         | 76.2         |
| 2016        | 709        | Castanheira                            | Neighborhood        | 13014        | 24         | 1.8          |
| 2016        | 53         | Areia Branca                           | Neighborhood        | 1647         | 23         | 14           |
| 2016        | 145        | São Joao do Garça                      | Ranch               | 51           | 23         | 451          |
| 2016        | 150        | Vila Codaron - Km 13                   | Village             | 474          | 23         | 48.5         |
| 2016        | 86         | Nova Porto Velho                       | Neighborhood        | 14748        | 21         | 1.4          |
| 2016        | 364        | Bairro do Roque -Extrema               | Neighborhood        | 539          | 20         | 37.1         |
| 2016        | 393        | São Francisco - Rio Madeira            | Ranch               | 35           | 20         | 571.4        |
| 2016        | 156        | Colônia Mato Grosso (Unir)             | Colony              | 120          | 19         | 158.3        |
| 2016        | 132        | Km 08                                  | Ranch               | 283          | 19         | 67.1         |
| <b>2017</b> | <b>887</b> | <b>Bairro Novo (Br 364)</b>            | <b>Neighborhood</b> | <b>1918</b>  | <b>141</b> | <b>73.5</b>  |
| 2017        | 121        | Bacia Leiteira                         | Ranch               | 180          | 111        | 616.7        |
| 2017        | 320        | Marmelo - Br 364 Pvh/Acre              | Ranch               | 58           | 89         | 1534.5       |
| 2017        | 737        | Km13/Santa Helena                      | Farm                | 378          | 87         | 230.2        |
| 2017        | 337        | Vista Alegre do Abunã                  | Village             | 3973         | 80         | 20.1         |
| 2017        | 140        | Km 14                                  | Ranch               | 247          | 78         | 315.8        |
| 2017        | 446        | Nazaré (P.D.S. Nazaré E Boa Vitória)   | Settlement          | 170          | 74         | 435.3        |
| 2017        | 443        | Lago do Cuniã - Resex do Lago do Cuniã | Settlement          | 272          | 61         | 224.3        |
| 2017        | 151        | Jerusalem da Amazonia                  | Ranch               | 120          | 60         | 500          |
| 2017        | 119        | Uberaba                                | Ranch               | 240          | 60         | 250          |
| 2017        | 152        | Colônia Japonesa                       | Colony              | 98           | 43         | 438.8        |
| <b>2017</b> | <b>148</b> | <b>Colônia Viçosa</b>                  | <b>Colony</b>       | <b>391</b>   | <b>40</b>  | <b>102.3</b> |
| 2017        | 372        | Nova California                        | Village             | 2650         | 39         | 14.7         |

|             |            |                                      |                     |              |           |             |
|-------------|------------|--------------------------------------|---------------------|--------------|-----------|-------------|
| 2017        | 145        | São Joao do Garça                    | Ranch               | 51           | 35        | 686.3       |
| 2017        | 110        | Km 08                                | Ranch               | 260          | 30        | 115.4       |
| 2017        | 214        | Linha H-27                           | Road                | 1350         | 30        | 22.2        |
| 2017        | 93         | Estrada da Penitencia (P.A. Aliança) | Settlement          | 241          | 29        | 120.3       |
| 2017        | 317        | Fortaleza do Abunã                   | Village             | 308          | 28        | 90.9        |
| 2017        | 898        | Vila do DNIT (8ª Região)             | Village             | 4684         | 28        | 6           |
| <b>2017</b> | <b>396</b> | <b>Belmont</b>                       | <b>Ranch</b>        | <b>585</b>   | <b>27</b> | <b>46.2</b> |
| 2017        | 407        | Maravilha (Rio Madeira)              | Ranch               | 185          | 26        | 140.5       |
| <b>2017</b> | <b>6</b>   | <b>Nova Esperança</b>                | <b>Neighborhood</b> | <b>11730</b> | <b>26</b> | <b>2.2</b>  |
| 2017        | 213        | Linha H-22                           | Road                | 149          | 25        | 167.8       |
| 2017        | 53         | Areia Branca                         | Neighborhood        | 1647         | 24        | 14.6        |
| 2017        | 399        | Cujubim Grande                       | Ranch               | 228          | 23        | 100.9       |
| 2017        | 841        | Ramal Da Castanheira - (Pvh-Acre)    | Road                | 112          | 23        | 205.4       |
| 2017        | 30         | Aponiã                               | Neighborhood        | 18012        | 22        | 1.2         |
| 2017        | 709        | Castanheira                          | Neighborhood        | 13014        | 22        | 1.7         |
| 2017        | 41         | Cohab                                | Neighborhood        | 11589        | 22        | 1.9         |
| 2017        | 22         | Aeroclube                            | Neighborhood        | 2625         | 19        | 7.2         |

**Figure S1.** Location of 25 sites sampled for anopheline presence in Porto Velho, Rondônia, Brazil. Four sites were selected: two urban (red dots) and two peri-urban sites (blue dots). Urban expansion area was depicted as the peripheral yellow area. Adapted from Google Earth (Image@2022 Maxar Technologies; Image@2022 CNES/Airbus) and from SEMPOG Google Maps (SEMPOG 2022).

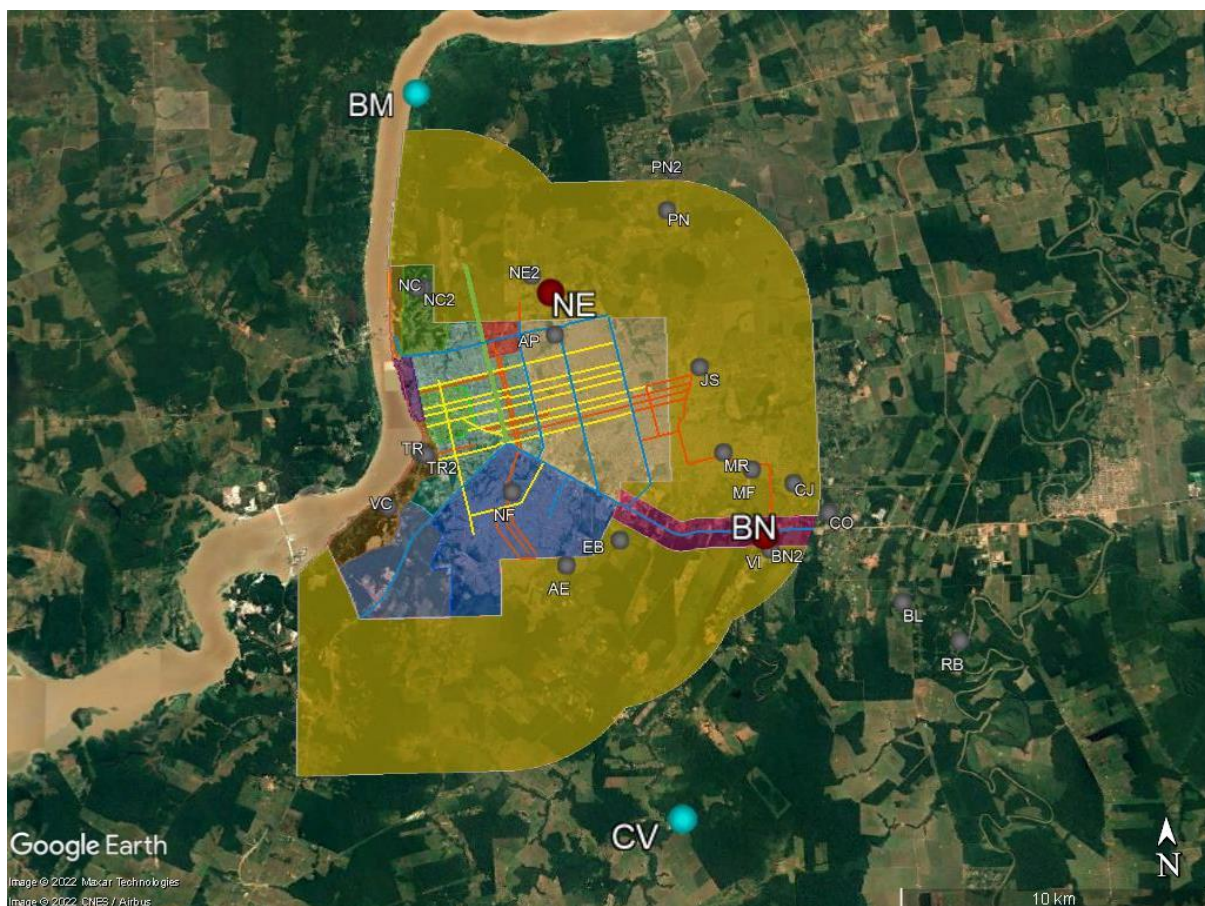

**Table S2.** Details on 25 sites where anopheline presence was recorded, and selected sites in bold.

| Locality Name           | Figure S1 Code | Locality Code SIVEP* | Settings          | Latitude            | Longitude            | <i>Anopheles</i> ** Occurrence |
|-------------------------|----------------|----------------------|-------------------|---------------------|----------------------|--------------------------------|
| <b>Belmont</b>          | <b>BM</b>      | <b>396</b>           | <b>Peri-urban</b> | <b>8°39'30.78"S</b> | <b>63°54'37.39"O</b> | <b>Positive</b>                |
| Penal 1                 | PN             | 93                   | Peri-urban        | 8°41'57.50"S        | 63°49'50.90"O        | +                              |
| Penal 2                 | PN2            | 93                   | Peri-urban        | 8°41'10.39"S        | 63°49'41.50"O        | -                              |
| Bacia Leiteira          | BL             | 121                  | Peri-urban        | 8°49'26.83"S        | 63°45'47.46"O        | -                              |
| Embrapa                 | EB             | -                    | Peri-urban        | 8°48'10.85"S        | 63°50'55.73"O        | -                              |
| Ramal do Boto           | RB             | 893                  | Peri-urban        | 8°50'9.84"S         | 63°44'46.88"O        | +                              |
| Couve                   | CO             | -                    | Peri-urban        | 8°47'47.12"S        | 63°47'3.34"O         | +                              |
| Vila Candelária         | VC             | 48                   | Peri-urban        | 8°47'27.21"S        | 63°55'11.84"O        | -                              |
| <b>Colônia Viçosa</b>   | <b>CV</b>      | <b>148</b>           | <b>Peri-urban</b> | <b>8°53'10.14"S</b> | <b>63°49'56.97"O</b> | <b>+</b>                       |
| <b>Nova Esperança 1</b> | <b>NE</b>      | <b>6</b>             | <b>Urban</b>      | <b>8°43'31.46"S</b> | <b>63°52'6.12"O</b>  | <b>+</b>                       |
| Nova Esperança 2        | NE2            | 6                    | Urban             | 8°43'10.02"S        | 63°52'27.43"O        | -                              |
| Triângulo 1             | TR             | 44                   | Urban             | 8°46'27.23"S        | 63°54'36.37"O        | +                              |
| Triângulo 2             | TR2            | 44                   | Urban             | 8°46'30.39"S        | 63°54'29.87"O        | -                              |
| Aeroclube               | AE             | 22                   | Urban             | 8°48'36.62"S        | 63°51'55.50"O        | +                              |
| Nacional 1              | NC             | 35                   | Urban             | 8°43'21.03"S        | 63°54'38.43"O        | -                              |
| Nacional 2              | NC2            | 35                   | Urban             | 8°43'19.48"S        | 63°54'31.85"O        | +                              |
| Mariana                 | MR             | 71                   | Urban             | 8°46'37.01"S        | 63°48'57.28"O        | -                              |
| Marcos Freire           | MF             | 70                   | Urban             | 8°46'56.86"S        | 63°48'26.58"O        | -                              |
| Viena                   | VI             | -                    | Urban             | 8°48'13.53"S        | 63°48'19.00"O        | -                              |
| <b>Bairro Novo 1</b>    | <b>BN</b>      | <b>887</b>           | <b>Urban</b>      | <b>8°48'10.97"S</b> | <b>63°48'14.84"O</b> | <b>+</b>                       |
| Bairro Novo 2           | BN2            | 887                  | Urban             | 8°48'25.31"S        | 63°48'10.00"O        | -                              |
| Cidade Jardim           | CJ             | 89                   | Urban             | 8°47'13.25"S        | 63°47'40.38"O        | -                              |
| Nova Floresta           | NF             | 56                   | Urban             | 8°47'14.38"S        | 63°52'54.20"O        | -                              |
| Jardim Santana          | JS             | 3                    | Urban             | 8°45'0.11"S         | 63°49'20.26"O        | -                              |
| Aponiã                  | AP             | 30                   | Urban             | 8°44'18.75"S        | 63°52'2.64"O         | -                              |

\* SIVEP MALARIA: Malaria Epidemiological Surveillance Information System

\*\* *Anopheles* Occurrence: Presence (+) or absence (-) during one night-sampling.

## Reference

SEMPOG - Municipal Planning, Budget and Management Department, PMPV - Prefeitura Municipal de Porto Velho (City Hall of Porto Velho). Institutional Planning and Strategic Management Department – DPGE. Available in: <https://sempog.portovelho.ro.gov.br/artigo/19378/zoneamento>. Access on April 18, 2022.
