# Supplementary material for: Anopheline diversity in urban and peri-urban malaria foci: comparison between alternative traps and seasonal effects in a city in the Western Brazilian Amazon
Source: PubMed Central journal article supplement (PMC9450372; doi:10.1186/s12936-022-04274-8), 2022-09-06
Supplement: 12936_2022_4274_MOESM3_ESM.pdf [file 12936_2022_4274_MOESM3_ESM.pdf]

### Additional File 3

Title of data: Non-anopheline mosquitoes and other Dipterans

Description of data: Table with the number of non-anopheline mosquitoes, biting midges (Ceratopogonidae: *Culicoides* spp.), and sand flies (Psychodidae: Phlebotominae) caught with Gazetrap, PHLC, and Screen (Table S3), over three seasonal periods (Table S4), in the urban and peri-urban settings of Porto Velho, state of Rondônia, Brazilian Amazon.

**Table S3.** Number of non-anopheline mosquitoes, biting midges, and sand flies caught with Gazetrap, PHLC, and Screen, at urban and peri-urban settings.

| Taxa                                    | Urban Setting |      |        | Peri-urban Setting |      |        |
|-----------------------------------------|---------------|------|--------|--------------------|------|--------|
|                                         | Gazetrap      | PHLC | Screen | Gazetrap           | PHLC | Screen |
| <i>Culex</i>                            | 292           | 557  | 170    | 309                | 184  | 139    |
| <i>Mansonia</i>                         | 47            | 27   | 7      | 398                | 434  | 127    |
| <i>Coquillettidia</i>                   | 1             | -    | 4      | 87                 | 70   | 5      |
| <i>Aedes</i>                            | 44            | 62   | 12     | 4                  | 7    | 2      |
| <i>Aedeomyia</i>                        | 25            | 2    | 2      | 8                  | 4    | 15     |
| <i>Psorophora</i>                       | -             | -    | -      | 4                  | -    | 2      |
| <i>Uranotaenia</i>                      | -             | -    | 1      | 2                  | -    | -      |
| <i>Wyeomyia</i>                         | -             | -    | -      | 3                  | -    | -      |
| Ceratopogonidae: <i>Culicoides</i> spp. | 35            | 30   | -      | 28                 | 3    | -      |
| Psychodidae: Phlebotominae              | 1             | -    | 6      | 11                 | 2    | 1      |
| Total                                   | 445           | 678  | 202    | 854                | 704  | 291    |

**Table S4.** Number of non-anopheline mosquitoes, biting midges, and sand flies caught during seasonal periods, at urban and peri-urban settings.

| Taxa                                    | Urban Setting |     |       | Peri-urban Setting |     |       |
|-----------------------------------------|---------------|-----|-------|--------------------|-----|-------|
|                                         | Transition    | Dry | Rainy | Transition         | Dry | Rainy |
| <i>Culex</i>                            | 378           | 337 | 304   | 91                 | 90  | 451   |
| <i>Mansonia</i>                         | 7             | 63  | 11    | 494                | 345 | 120   |
| <i>Coquillettidia</i>                   | 1             | 4   | -     | 98                 | 37  | 27    |
| <i>Aedes</i>                            | 44            | 3   | 71    | 8                  | 1   | 4     |
| <i>Aedeomyia</i>                        | 22            | 6   | 1     | 1                  | 24  | 2     |
| <i>Psorophora</i>                       | -             | -   | -     | 2                  | 1   | 3     |
| <i>Uranotaenia</i>                      | 1             | -   | -     | 1                  | 1   | -     |
| <i>Wyeomyia</i>                         | -             | -   | -     | -                  | 1   | 2     |
| Ceratopogonidae: <i>Culicoides</i> spp. | 24            | 11  | 30    | 21                 | 2   | 8     |
| Psychodidae: Phlebotominae              | 3             | 1   | 3     | 8                  | 2   | 4     |
| Total                                   | 480           | 425 | 420   | 724                | 504 | 621   |
