# Supplementary material for: Anopheline diversity in urban and peri-urban malaria foci: comparison between alternative traps and seasonal effects in a city in the Western Brazilian Amazon
Source: PubMed Central journal article supplement (PMC9450372; doi:10.1186/s12936-022-04274-8), 2022-09-06
Supplement: 12936_2022_4274_MOESM4_ESM.pdf [file 12936_2022_4274_MOESM4_ESM.pdf]

#### Additional File 4

Title of data: Supplementary results for the number of individuals/species of *Anopheles*.

Description of data: Tables with the *Anopheles* species and individuals (N) captured in urban and peri-urban settings, using Gazetrap, PHLC, and Barrier Screen techniques, during the Dry, Rainy, and Transitional seasons. Collections were done at the city of Porto Velho, state of Rondônia, Brazilian Amazon.

**Table S5.** *Anopheles* species and individuals (N) captured at urban and peri-urban settings of Porto Velho, state of Rondônia, Brazilian Amazon.

| Species                                    | Urban      |              | Peri-urban  |              | Total        |
|--------------------------------------------|------------|--------------|-------------|--------------|--------------|
|                                            | Indiv.     | %            | Indiv.      | %            |              |
| <i>An. darlingi</i>                        | 284        | 54.51        | 2,279       | 93.36        | 2,563        |
| <i>An. triannulatus</i>                    | 176        | 33.78        | 1           | 0.04         | 177          |
| <i>An. mattogrossensis</i>                 | 2          | 0.38         | 94          | 3.85         | 96           |
| <i>An. konderi</i>                         | 1          | 0.19         | 43          | 1.76         | 44           |
| <i>An. strodei</i>                         | 17         | 3.26         | 1           | 0.04         | 18           |
| <i>An. nuneztovari</i>                     | 9          | 1.73         | 8           | 0.33         | 17           |
| <i>Anopheles spp.</i>                      | 9          | 1.73         | 8           | 0.33         | 17           |
| <i>An. benarrochi</i>                      | 10         | 1.92         | -           | -            | 10           |
| <i>An. deaneorum</i>                       | 2          | 0.38         | 4           | 0.16         | 6            |
| <i>An. argyritarsis</i>                    | 4          | 0.77         | 1           | 0.04         | 5            |
| <i>An. minor</i>                           | 3          | 0.58         | 1           | 0.04         | 4            |
| <i>An. mediopunctatus/costai/forattini</i> | 2          | 0.38         | -           | -            | 2            |
| <i>An. peryassui</i>                       | 1          | 0.19         | 1           | 0.04         | 2            |
| <i>An. braziliensis</i>                    | 1          | 0.19         | -           | 0.00         | 1            |
| <b>Total</b>                               | <b>521</b> | <b>17.59</b> | <b>2441</b> | <b>82.41</b> | <b>2,962</b> |

**Table S6.** *Anopheles* species and individuals (N) captured through Gazetrap, PHLC, and Barrier Screen in Porto Velho, state of Rondônia, Brazilian Amazon.

| Species                 | Gazetrap |       | PHLC |       | Screen |       | Total |
|-------------------------|----------|-------|------|-------|--------|-------|-------|
|                         | N        | %     | N    | %     | N      | %     |       |
| <i>An. darlingi</i>     | 535      | 20.87 | 1473 | 57.47 | 555    | 21.65 | 2,563 |
| <i>An. triannulatus</i> | 39       | 22.03 | 106  | 59.89 | 32     | 18.08 | 177   |

|                                            |            |              |             |              |            |              |              |
|--------------------------------------------|------------|--------------|-------------|--------------|------------|--------------|--------------|
| <i>An. mattogrossensis</i>                 | 56         | 58.33        | 18          | 18.75        | 22         | 22.92        | 96           |
| <i>An. konderi</i>                         | 7          | 15.91        | 22          | 50           | 15         | 34.09        | 44           |
| <i>An. strodei</i>                         | 2          | 11.11        | 11          | 61.11        | 5          | 27.78        | 18           |
| <i>An. nuneztovari</i>                     | 5          | 29.41        | 8           | 47.06        | 4          | 23.53        | 17           |
| <i>Anopheles spp.</i>                      | 2          | 11.76        | 12          | 70.59        | 3          | 17.65        | 17           |
| <i>An. benarrochi</i>                      | 3          | 30           | 7           | 70           | -          | -            | 10           |
| <i>An. deaneorum</i>                       | 3          | 50           | 2           | 33.33        | 1          | 16.67        | 6            |
| <i>An. argyritarsis</i>                    | 2          | 40           | 2           | 40           | 1          | 20           | 5            |
| <i>An. minor</i>                           | 3          | 75           | -           | -            | 1          | 25           | 4            |
| <i>An. mediopunctatus/costai/forattini</i> | -          | -            | -           | -            | 2          | 100          | 2            |
| <i>An. peryassui</i>                       | 1          | 50           | 1           | 50           | -          | -            | 2            |
| <i>An. braziliensis</i>                    | 1          | 100          | -           | -            | -          | -            | 1            |
| <b>Total</b>                               | <b>659</b> | <b>22.25</b> | <b>1662</b> | <b>56.11</b> | <b>641</b> | <b>21.64</b> | <b>2,962</b> |

**Table S7.** *Anopheles* species and individuals (N) captured in the Dry, Rainy, and Transitional seasons, at Porto Velho, state of Rondônia, Brazilian Amazon.

| Species                                    | Dry         |              | Rainy      |              | Transition |              | Total        |
|--------------------------------------------|-------------|--------------|------------|--------------|------------|--------------|--------------|
|                                            | N           | %            | N          | %            | N          | %            |              |
| <i>An. darlingi</i>                        | 1145        | 44.67        | 691        | 26.96        | 727        | 28.37        | 2,563        |
| <i>An. triannulatus</i>                    | 95          | 53.67        | 25         | 14.12        | 57         | 32.20        | 177          |
| <i>An. mattogrossensis</i>                 | 14          | 14.58        | 13         | 13.54        | 69         | 71.88        | 96           |
| <i>An. konderi</i>                         | 2           | 4.55         | 22         | 5            | 20         | 45.45        | 44           |
| <i>An. strodei</i>                         | 14          | 77.78        | -          | -            | 4          | 22.22        | 18           |
| <i>An. nuneztovari</i>                     | 4           | 23.53        | 8          | 47.06        | 5          | 29.41        | 17           |
| <i>Anopheles spp.</i>                      | 4           | 23.53        | 6          | 35.29        | 7          | 41.18        | 17           |
| <i>An. benarrochi</i>                      | -           | -            | 3          | 30           | 7          | 70           | 10           |
| <i>An. deaneorum</i>                       | 1           | 16.67        | -          | -            | 5          | 83.33        | 6            |
| <i>An. argyritarsis</i>                    | 3           | 60           | 1          | 20           | 1          | 20           | 5            |
| <i>An. minor</i>                           | 2           | 50           | -          | -            | 2          | 50           | 4            |
| <i>An. mediopunctatus/costai/forattini</i> | 2           | 100          | -          | -            | -          | -            | 2            |
| <i>An. peryassui</i>                       | -           | -            | -          | -            | 2          | 100          | 2            |
| <i>An. braziliensis</i>                    | 1           | 100          | -          | -            | -          | -            | 1            |
| <b>Total</b>                               | <b>1287</b> | <b>43.45</b> | <b>769</b> | <b>25.96</b> | <b>906</b> | <b>30.59</b> | <b>2,962</b> |

Title of data: Model Output – Best-fitted models

Description of data: Generalized linear mixed model (GLMM) with negative binomial errors for the effects of city setting, sampling technique, season, and random effects on *Anopheles* spp. abundance. Summary output from the null model GLM examining anopheline richness

estimates (Poisson errors). All estimates were transformed in the *tab\_model* command from *sjplot* package (see Lüdtke 2021).

**Table S8.** Summary of estimates from the best approximation models for anopheline abundance and richness.

| <i>Predictors</i>                                          | <b>Abundance – GLMM</b>               |              |                |                |
|------------------------------------------------------------|---------------------------------------|--------------|----------------|----------------|
|                                                            | <i>IRR*</i>                           | <i>CI</i>    | <i>z value</i> | <i>p</i>       |
| <b><i>Fixed effects</i></b>                                |                                       |              |                |                |
| Intercept**                                                | 16.24                                 | 9.10 – 28.99 | 9.43           | < <b>0.001</b> |
| Urban Setting                                              | 0.28                                  | 0.21 – 0.38  | -8.61          | < <b>0.001</b> |
| PHLC Technique                                             | 2.35                                  | 1.74 – 3.16  | 5.61           | < <b>0.001</b> |
| Screen Technique                                           | 0.90                                  | 0.64 – 1.25  | -0.65          | 0.514          |
| Rainy Season                                               | 0.63                                  | 0.30 – 1.35  | -1.18          | 0.238          |
| Transition Season                                          | 0.67                                  | 0.31 – 1.42  | -1.05          | 0.292          |
| <b><i>Random effects</i></b>                               |                                       |              |                |                |
| $\sigma^2 = 0.45$                                          | Within-group-variance                 |              |                |                |
| $\tau_{00} = 0.70$ <small>Sampling_event:DOY</small>       | Between-group-variance                |              |                |                |
| ICC = 0.61                                                 | Between-group-variance/Total variance |              |                |                |
| N 6 <small>Sampling_event</small><br>36 <small>DOY</small> |                                       |              |                |                |
| Observations                                               | 162                                   |              |                |                |
| Marginal R <sup>2</sup> ***                                | 0.031                                 |              |                |                |
| Conditional R <sup>2</sup> ***                             | 0.067                                 |              |                |                |
| <b>Richness - Null Model - GLM</b>                         |                                       |              |                |                |
|                                                            | <i>IRR*</i>                           | <i>CI</i>    | <i>z value</i> | <i>p</i>       |
| Intercept                                                  | 1.19                                  | 0.99 – 1.43  | 1.85           | 0.064          |

Legend: \*Incidence Rate Ratios \*\*Intercept: The basal levels of all predictors (Peri-urban Setting, Gazebo Technique, Dry Season). *p* = Pseudo R-squared statistics; *CI* = Confidence intervals. Random effects:  $\sigma^2$  = Residual variance of random effects;  $\tau_{00}$  = Tau-00, Variation between individual intercepts and average intercept; ICC = Intraclass-Correlation Coefficient; Marginal R<sup>2</sup> = variance explained by fixed effects; Conditional R<sup>2</sup> = variance explained by fixed and random effects. R<sup>2</sup>\*\*\* = Pseudo R-squared statistics proposed by Nakagawa et al. (2017).

### Notes on Marginal R<sup>2</sup> and Conditional R<sup>2</sup>

Marginal (R<sup>2</sup><sub>m</sub>) and Conditional (R<sup>2</sup><sub>c</sub>) r-squared were computed using MuMIn R package (Bartoń 2020) which proposes delta method, lognormal approximation, and trigamma function

for deriving variance. The trigamma-estimates were recommended whenever available for model family/structure, and according to Nakagawa et al. (2017), trigamma function provides the most accurate estimate of the observation-level variances.

```
library(MuMIn)      # R code for the package
r.squaredGLMM(m5)  # R code for function
```

| Method    | R <sup>2</sup> <sub>m</sub> | R <sup>2</sup> <sub>c</sub> |
|-----------|-----------------------------|-----------------------------|
| delta     | 0.11515869                  | 0.24202203                  |
| lognormal | 0.21283918                  | 0.44731120                  |
| trigamma  | 0.03185788                  | 0.06695378                  |

Title of data: PERMANOVA/PERMDISP estimates and NMDS plots

Description of data: There were no significant patterns in the *Anopheles* assemblage structure when seasons and sampling techniques were compared by Permutational Multivariate Analysis of Variance (PERMANOVA) and Permutational Analysis of Multivariate Dispersions (PERMDISP) tests. Nonmetric multidimensional scaling (NMDS) plots were used to depict *Anopheles* assemblage dissimilarities among predictor levels. The R *vegan*, *lattice*, and *permute* packages were used in the compositional analyses.

**Table S9.** PERMANOVA and PERMDISP analyses for *Anopheles* assemblage structure between seasons and sampling techniques.

| Permutational Analysis                        | Source    | df | SS    | MS    | pseudo-F | R <sup>2</sup> | P     |
|-----------------------------------------------|-----------|----|-------|-------|----------|----------------|-------|
| Multivariate<br>Variance<br>(PERMANOVA)       | Season    | 2  | 0.265 | 0.132 | 1.114    | 0.129          | 0.382 |
|                                               | Residuals | 15 | 1.787 | 0.119 |          | 0.870          |       |
|                                               | Total     | 17 | 2.053 |       |          | 1.000          |       |
|                                               | Technique | 2  | 0.080 | 0.040 | 0.173    | 0.037          | 0.985 |
|                                               | Residuals | 9  | 2.093 | 0.232 |          | 0.962          |       |
| Multivariate<br>beta-dispersion<br>(PERMDISP) | Total     | 11 | 2.174 |       |          | 1.00           |       |
|                                               | Season    | 2  | 0.064 | 0.032 | 1.230    |                | 0.319 |
|                                               | Residuals | 15 | 0.390 | 0.026 |          |                |       |
|                                               | Technique | 2  | 0.011 | 0.005 | 0.166    |                | 0.834 |
|                                               | Residuals | 9  | 0.307 | 0.034 |          |                |       |

PERMANOVA and PERMDISP were based on Sørensen dissimilarities. Abbreviations: df = degrees of freedom, SS = sum of squares, MS = mean sum of squares, pseudo-F = F value obtained by 999 permutations. Season levels: Dry, Rainy, and Transitional seasons. Technique levels: Gazetrap, PHLC, and Screen.

**Fig. S2.** Non-metric multidimensional scaling (NMDS) plots for graphical visualization of the PERMANOVA and PERMDISP analyses of *Anopheles* assemblage structure. **a** Assemblage distances between Dry, Rainy, and Transition seasons (Stress=0.137). **b** Assemblage distances between Gazetrap, PHLC, and Screen techniques (Stress= 0.061). Compositional distances were computed through matrices of Sørensen dissimilarities. See PERMANOVA and PERMDISP results in Table S9.

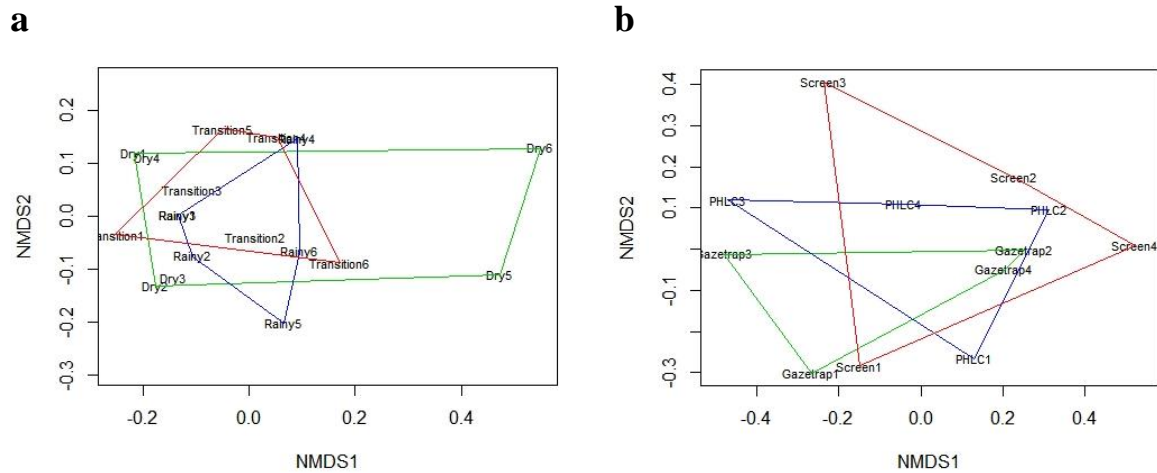

## References

BARTOŃ, K. MuMIn: multi-model inference. R package version 1.43. 17. Retrieved May, v. 11, p. 2021, 2020.

Lüdecke D. Summary of Regression Models as HTML Table. 2021-11-26. Available in: [https://cran.r-project.org/web/packages/sjPlot/vignettes/tab\\_model\\_estimates.html](https://cran.r-project.org/web/packages/sjPlot/vignettes/tab_model_estimates.html). Access on May 11, 2022.

Nakagawa S, Johnson PC, Schielzeth H. The coefficient of determination  $R^2$  and intra-class correlation coefficient from generalized linear mixed-effects models revisited and expanded.

J R Soc. Interface, 2017; 14(134):20170213. doi: 10.1098/rsif.2017.0213
